# Supplementary material
Source: Springer Nature journal article supplement (https://www.springermedizin.de/resource/supplementary/12943_2010_780_MOESM8_ESM.pdf/9554802)

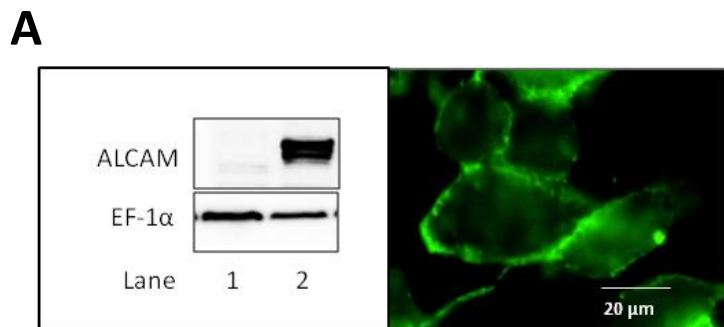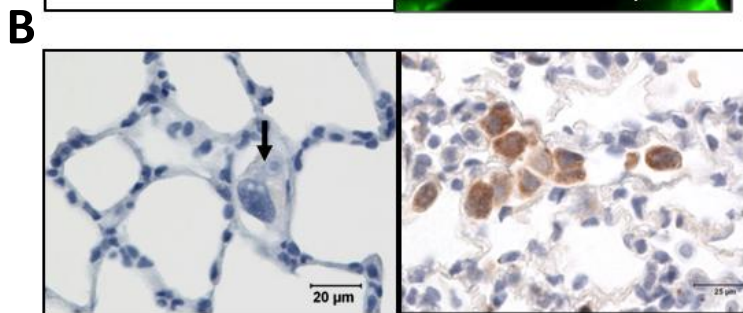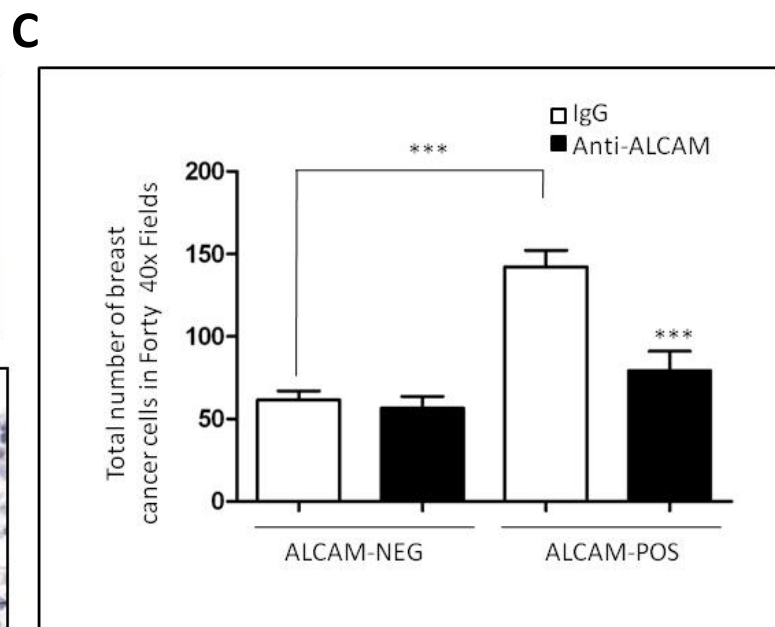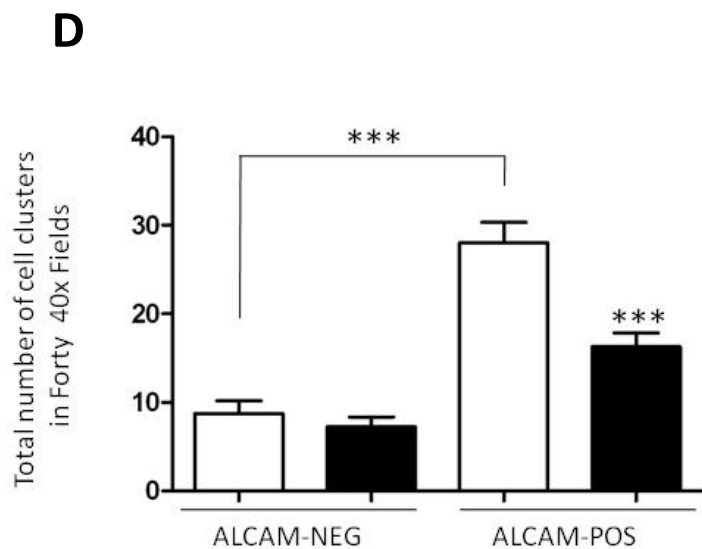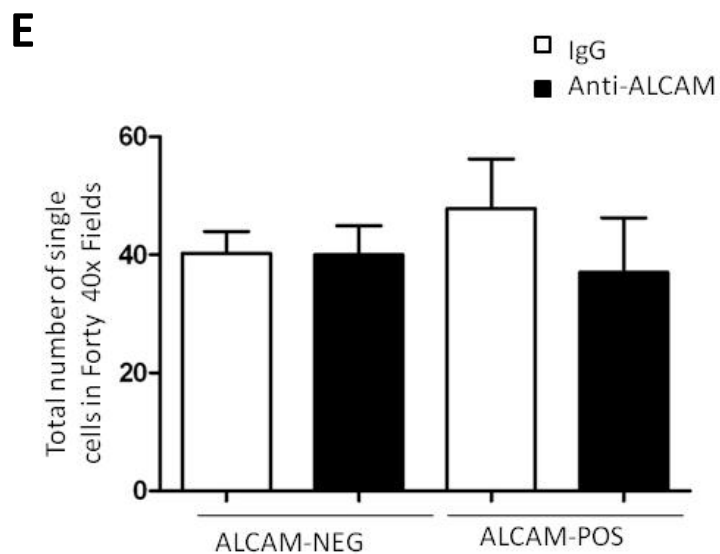

Supplement: MOESM8 [file 9554802]
